# Supplementary material
Source: publisher figshare collection journal article supplement (https://frontiersin.figshare.com/ndownloader/files/28559658)

## ***Supplementary Material***

**Supplementary Table 1** Baseline demographic and clinical characteristics of NSCLC patients with targeted therapy and chemotherapy.

| <b>Characteristics</b>   | <b>Targeted Therapy<br/>N=329 (%)</b> | <b>Chemotherapy<br/>N=570 (%)</b> |
|--------------------------|---------------------------------------|-----------------------------------|
| Age(years), median range | 60.7 (26.0~86.0)                      | 61.0 (26.0~84.0)                  |
| Gender                   |                                       |                                   |
| Male                     | 133 (40.4)                            | 391 (68.6)                        |
| Female                   | 196 (59.6)                            | 179 (31.4)                        |
| Smoking status           |                                       |                                   |
| Former-smoker            | 25 (7.6)                              | 82 (14.4)                         |
| Current-smoker           | 60 (18.2)                             | 193 (33.9)                        |
| Non-smoker               | 244 (74.2)                            | 295 (51.8)                        |
| Histology                |                                       |                                   |
| Adenocarcinoma           | 310 (94.2)                            | 413 (72.5)                        |
| Squamous cell carcinoma  | 6 (1.8)                               | 135 (23.7)                        |
| Other                    | 13 (4.0)                              | 22 (3.9)                          |
| EGFR                     |                                       |                                   |
| Wild type                | 43 (13.1)                             | 387 (67.9)                        |
| Mutation                 | 259 (78.7)                            | 80 (14.0)                         |
| 19                       | 124 (47.9)                            | 41 (51.1)                         |
| 21                       | 125 (48.3)                            | 26 (32.5)                         |
| Other                    | 10 (3.9)                              | 13 (16.3)                         |
| Unknown                  | 27 (8.2)                              | 103 (18.1)                        |
| LIPI                     |                                       |                                   |
| Good                     | 211 (64.1)                            | 340 (59.6)                        |
| Intermediate             | 93 (28.3)                             | 185 (32.5)                        |
| Poor                     | 25 (7.6)                              | 45 (7.9)                          |

**Supplementary Table 2:** Pairwise comparison of Progression-free survival (PFS) in three LIPI groups.

|                    | Immunotherapy( <i>P</i> -value) | Target therapy( <i>P</i> -value) | Chemotherapy( <i>P</i> -value) |
|--------------------|---------------------------------|----------------------------------|--------------------------------|
| Good vs Intermedia | 0.002                           | 0.431                            | 0.332                          |
| Good vs Poor       | 0.666                           | 0.142                            | 0.056                          |
| Intermedia vs Poor | 0.199                           | 0.251                            | 0.118                          |

**Supplementary Table 3:** Pairwise comparison of Overall survival (OS) in three LIPI groups.

|                    | Immunotherapy( <i>P</i> -value) | Target therapy( <i>P</i> -value) | Chemotherapy( <i>P</i> -value) |
|--------------------|---------------------------------|----------------------------------|--------------------------------|
| Good vs Intermedia | 0.07                            | 0.001                            | 0.284                          |
| Good vs Poor       | 0.213                           | 0.01                             | 0.013                          |
| Intermedia vs Poor | 0.473                           | 0.764                            | 0.065                          |

### Supplementary figure

**Supplementary figure 1:** Flow chart of our targeted immunotherapy cohort.

**Supplementary figure 2:** Flow chart of our targeted therapy and chemotherapy cohort.

**Supplementary figure 3:** Funnel plot of progression-free survival; 3A: funnel plot of all including studies; funnel plot of subgroup analysis 3B (LIPI: good vs intermediate) and 3C (LIPI: good vs poor)

**Supplementary figure 4:** Funnel plot of Overall survival; 4A: funnel plot of all including studies; funnel plot of subgroup analysis 4B (LIPI score: good vs intermediate) and 4C (LIPI score: good vs poor)

**Supplementary figure 5:** Sensitivity analysis of progression-free survival (5A) and overall survival (5B)

Supplementary figure 1

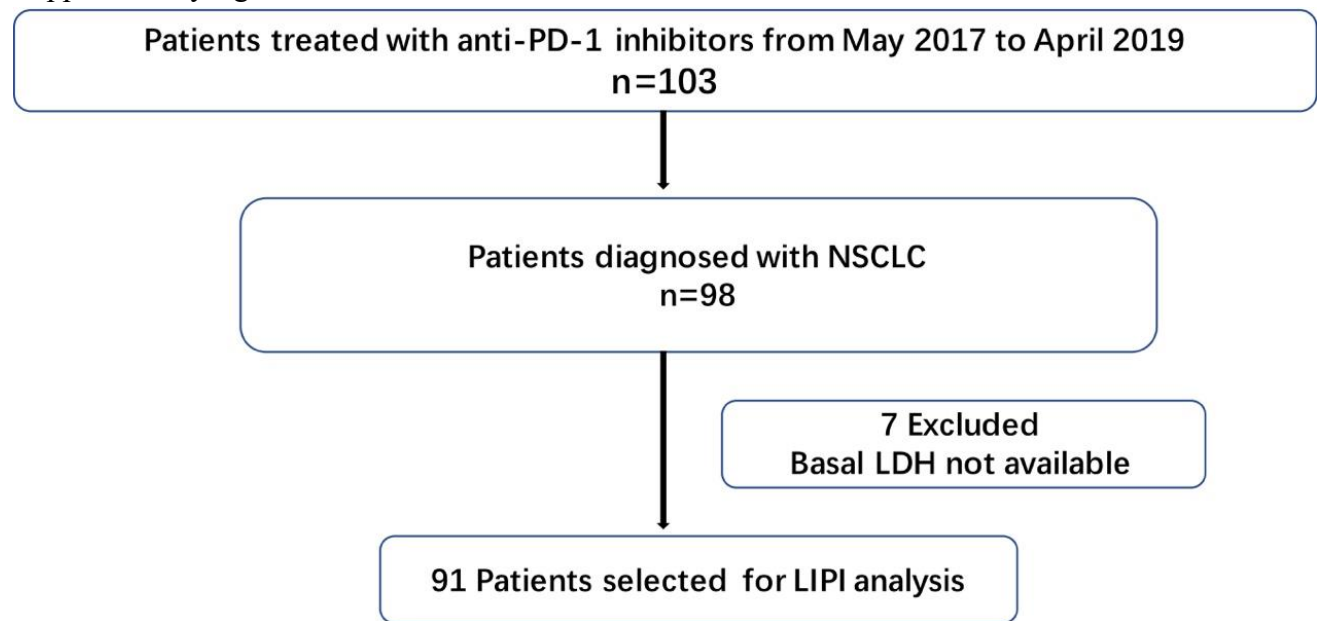

Supplementary figure 2

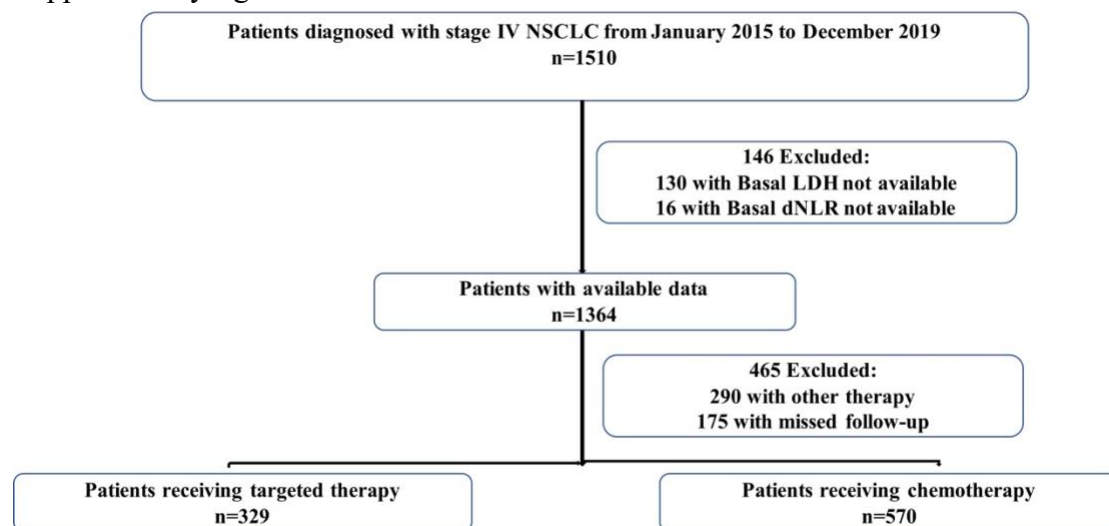

Supplementary figure 3A

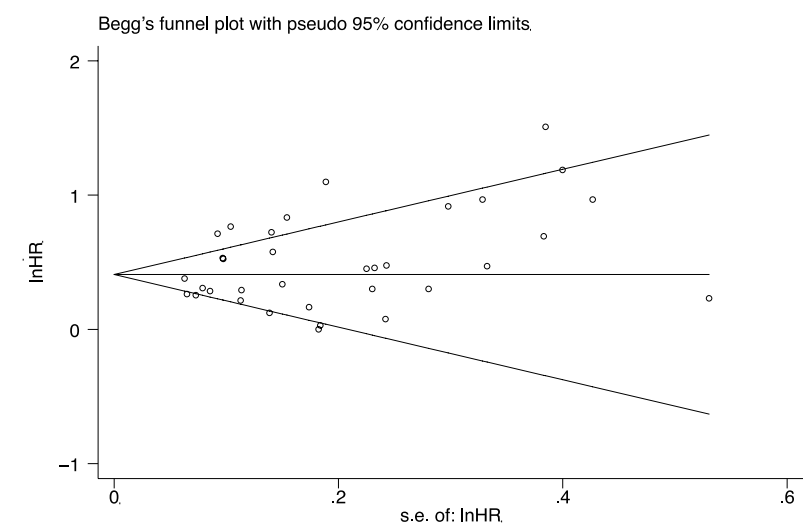

Supplementary figure 3B

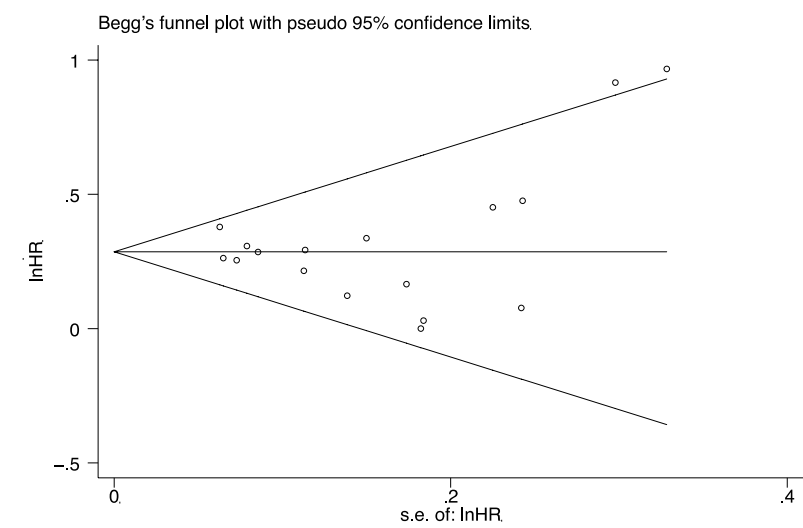

Supplementary figure 3C

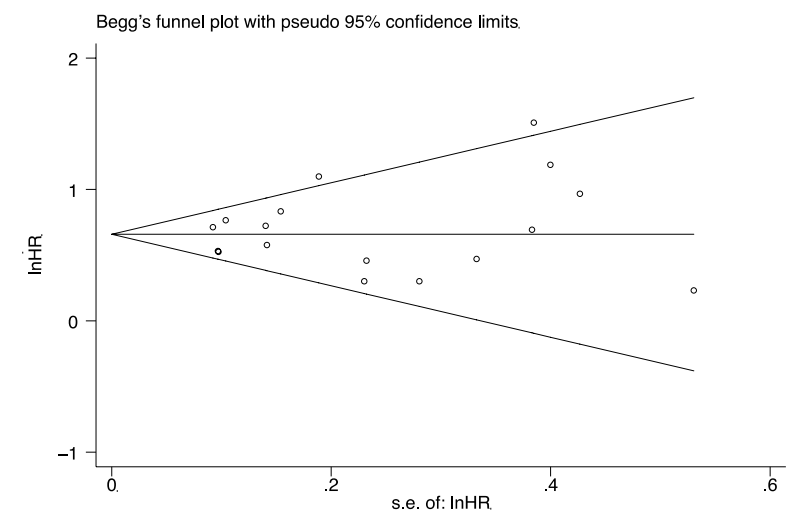

Supplementary figure 4A

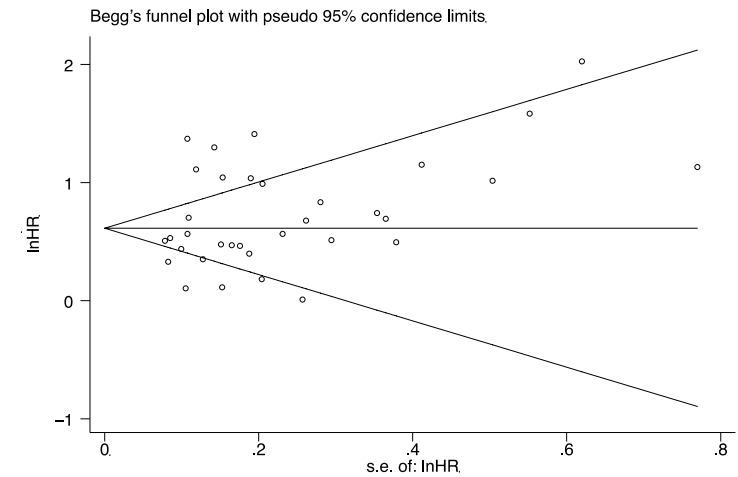

Supplementary figure 4B

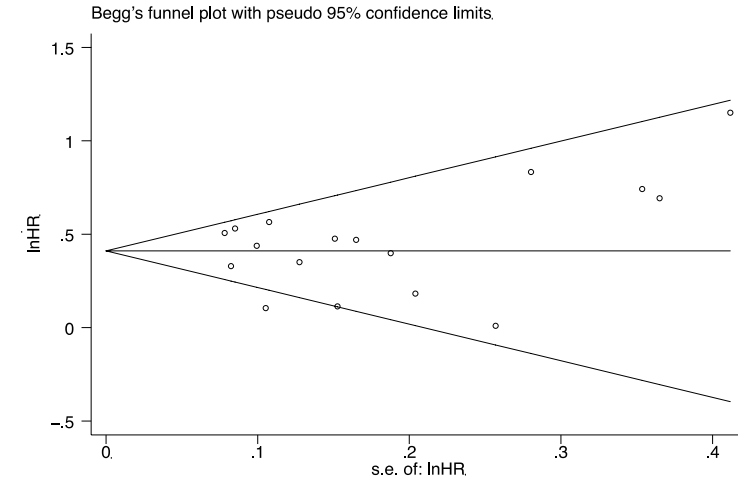

Supplementary figure 4C

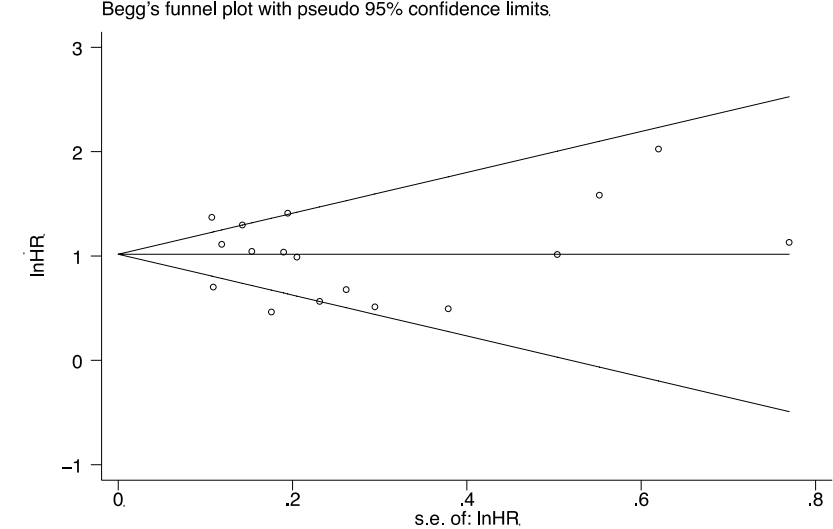

Supplementary figure 5A

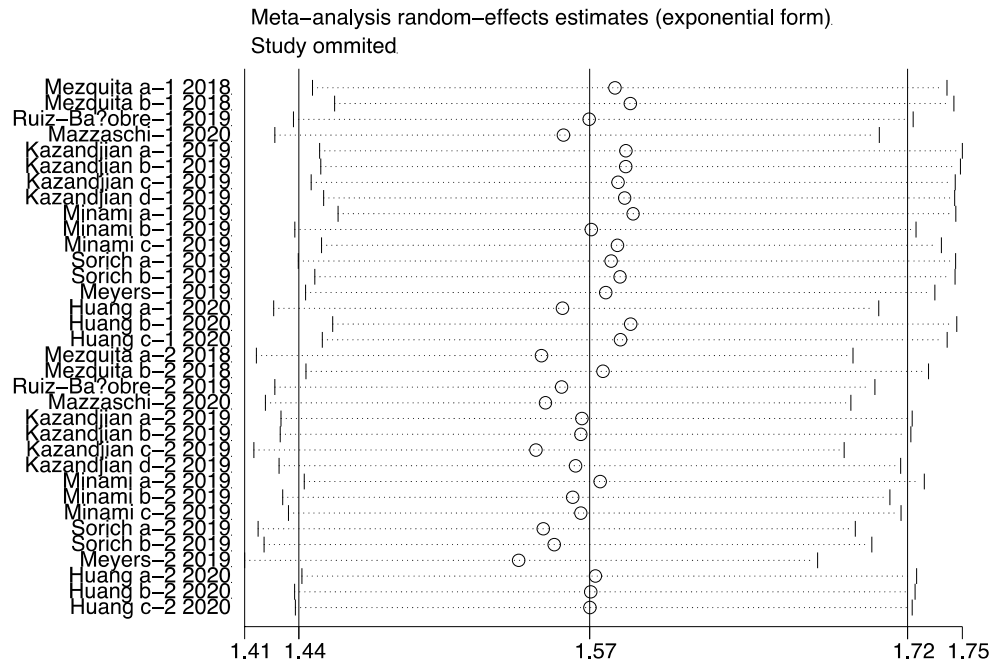

Supplementary figure 5B

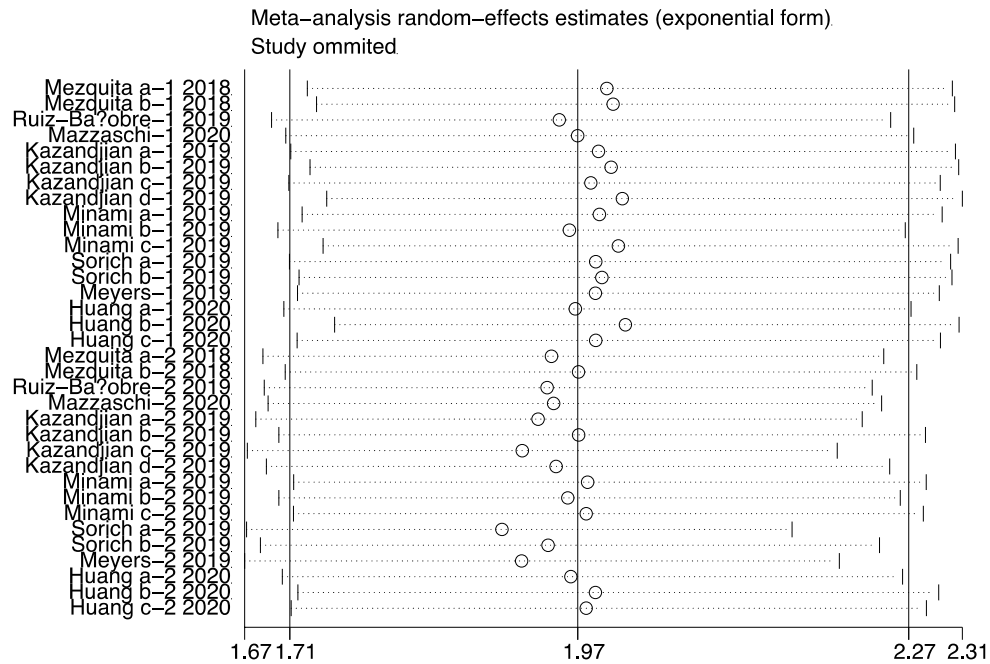

Supplement: Supplementary file [file 28559658]
